# Supplementary material for: Identification of Floral Scent Profiles in Bearded Irises
Source: MDPI journal article supplement (doi:10.3390/molecules24091773), 2019-05-07
Supplement: s1 [file s1]

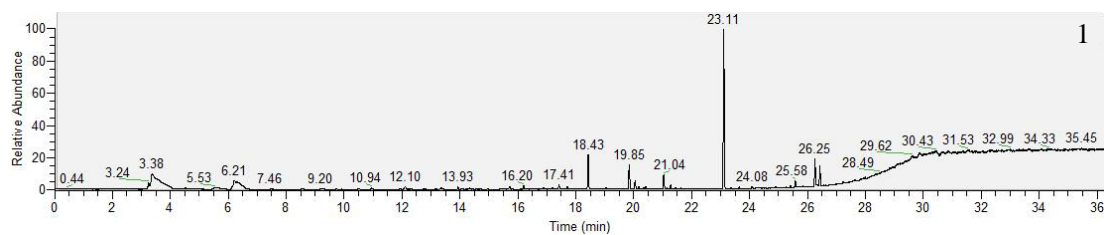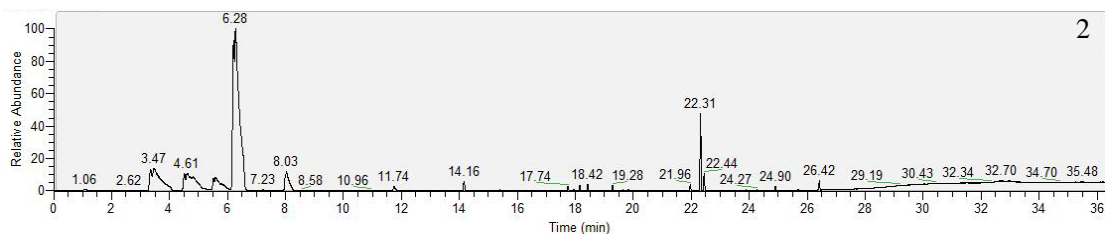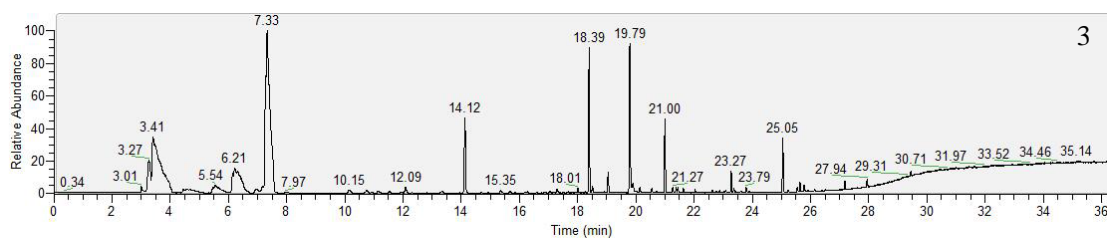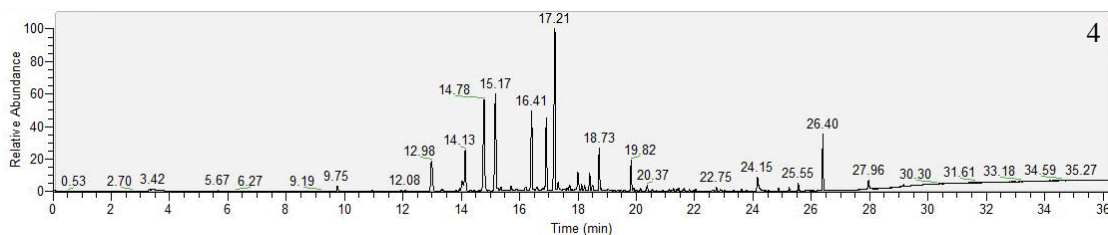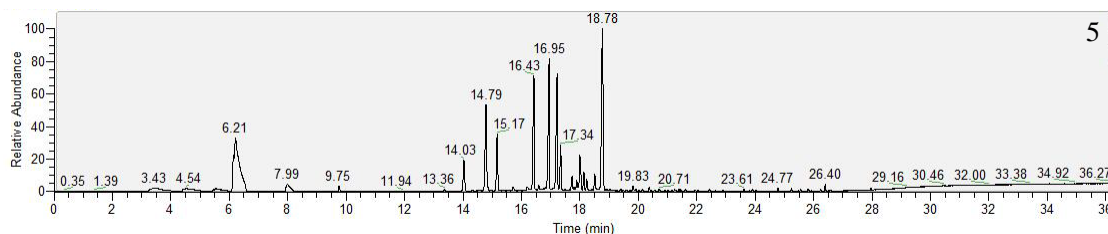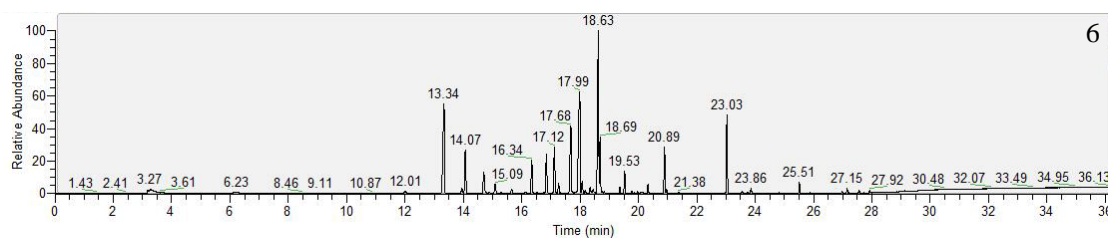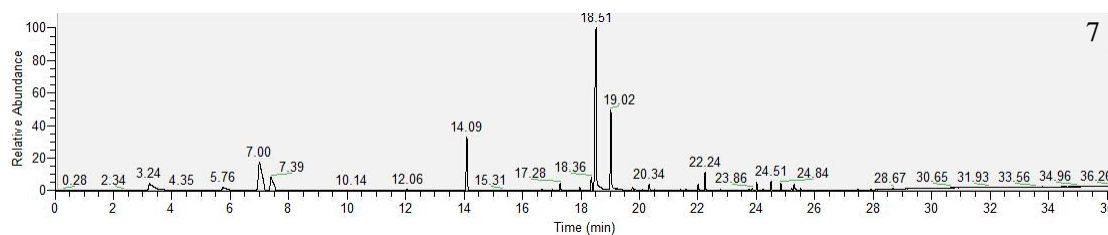

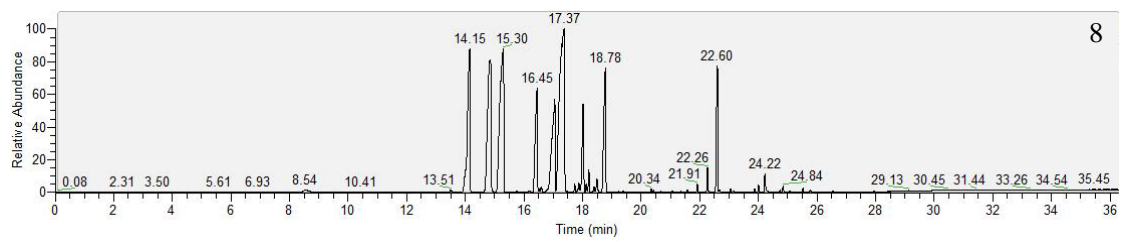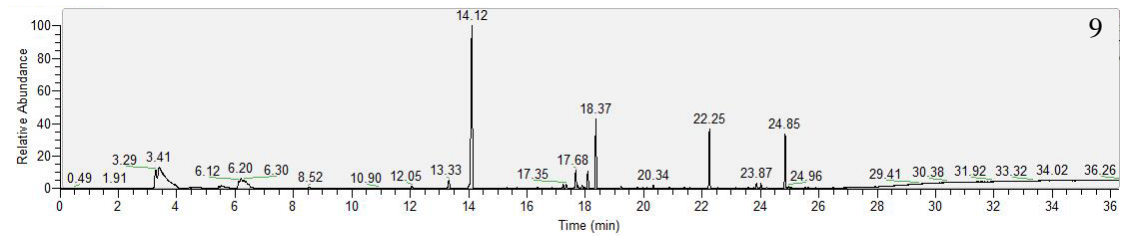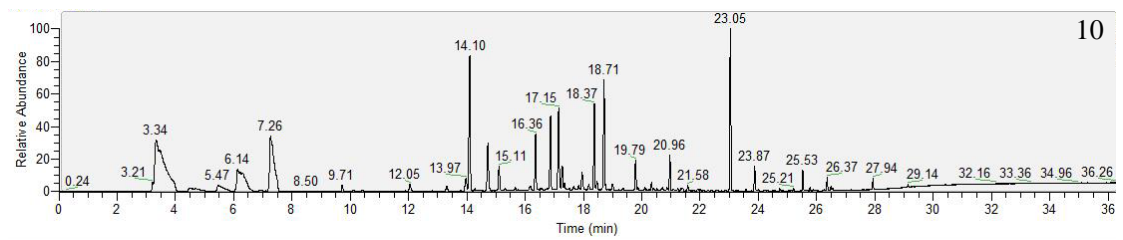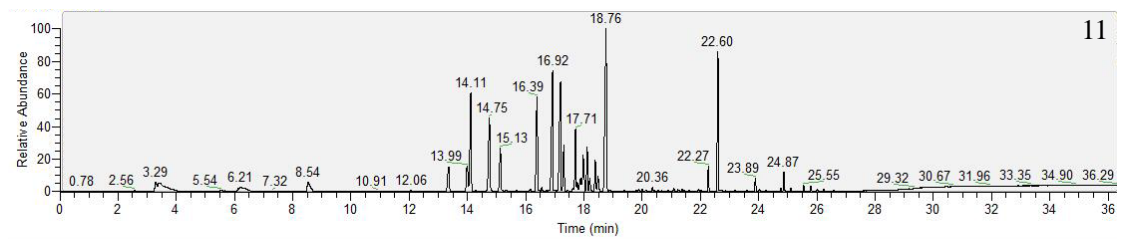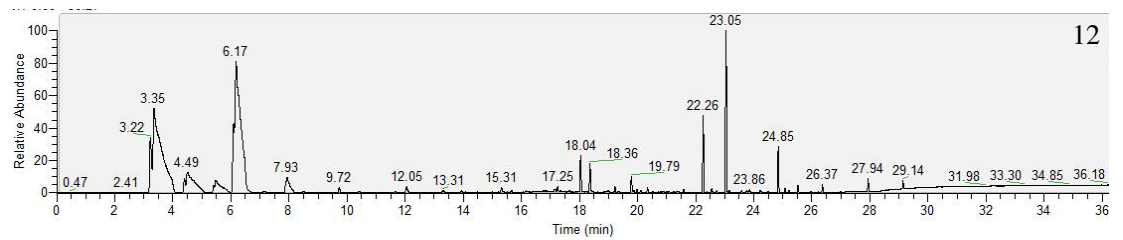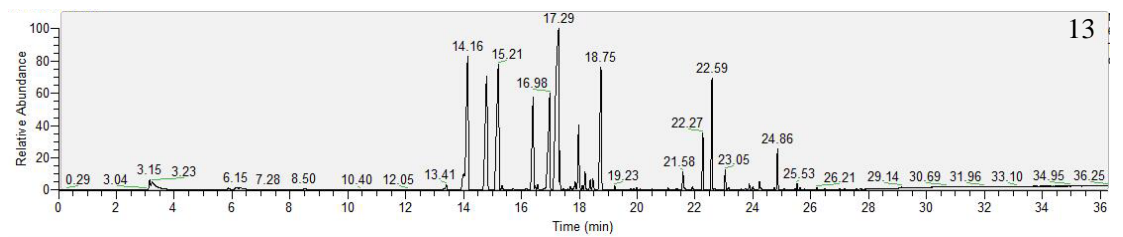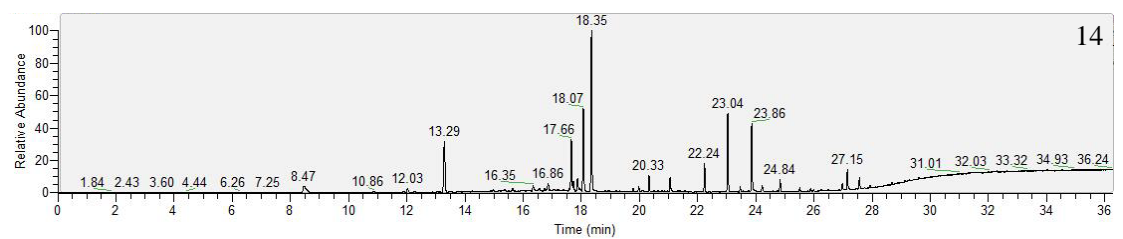

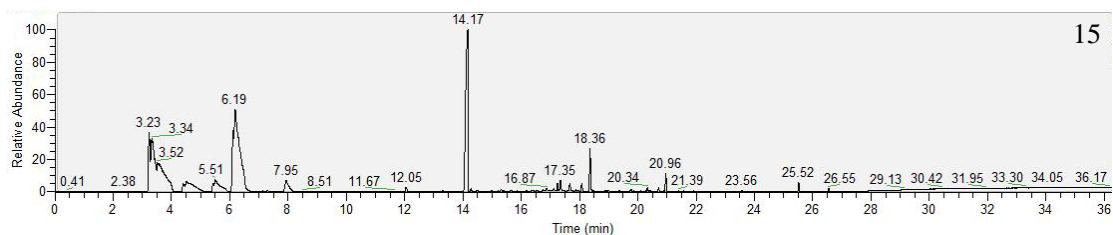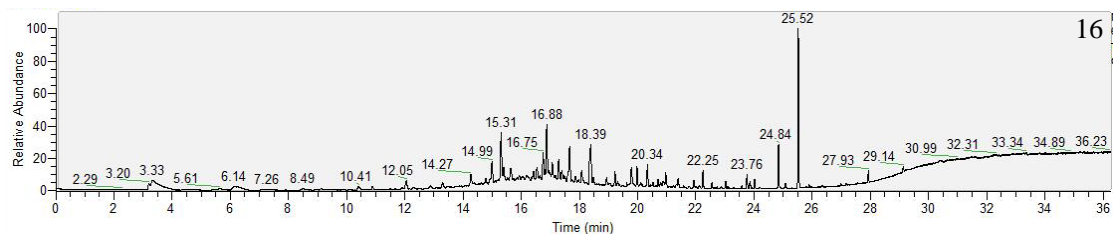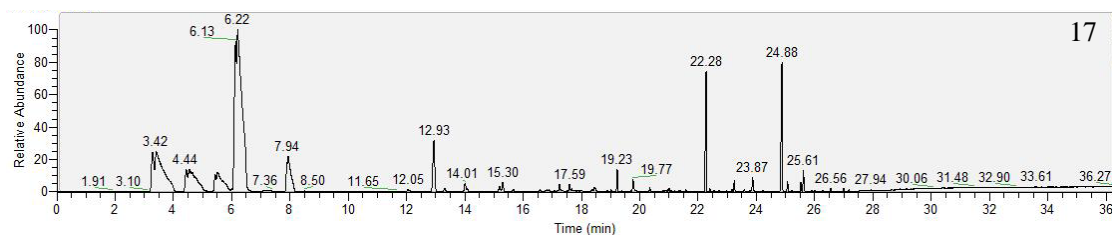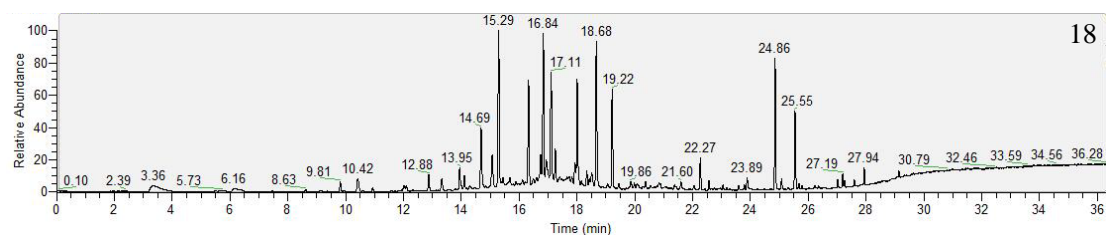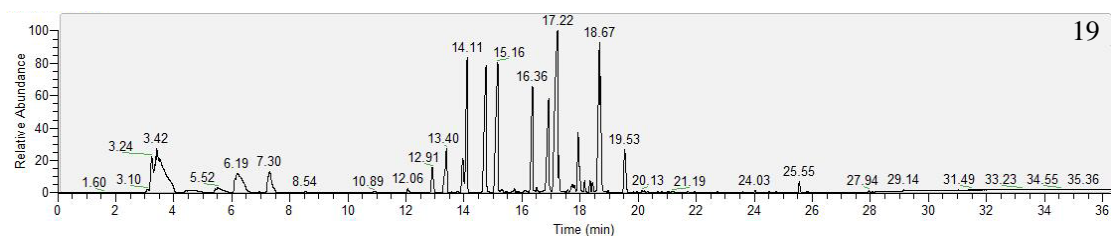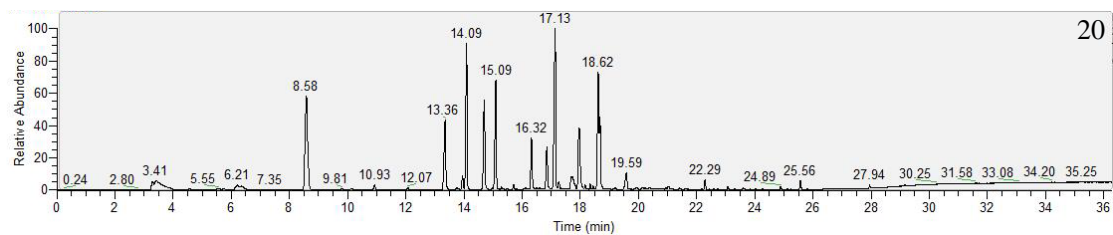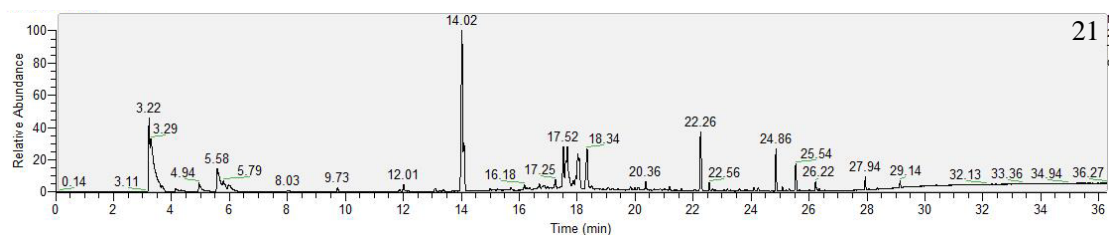

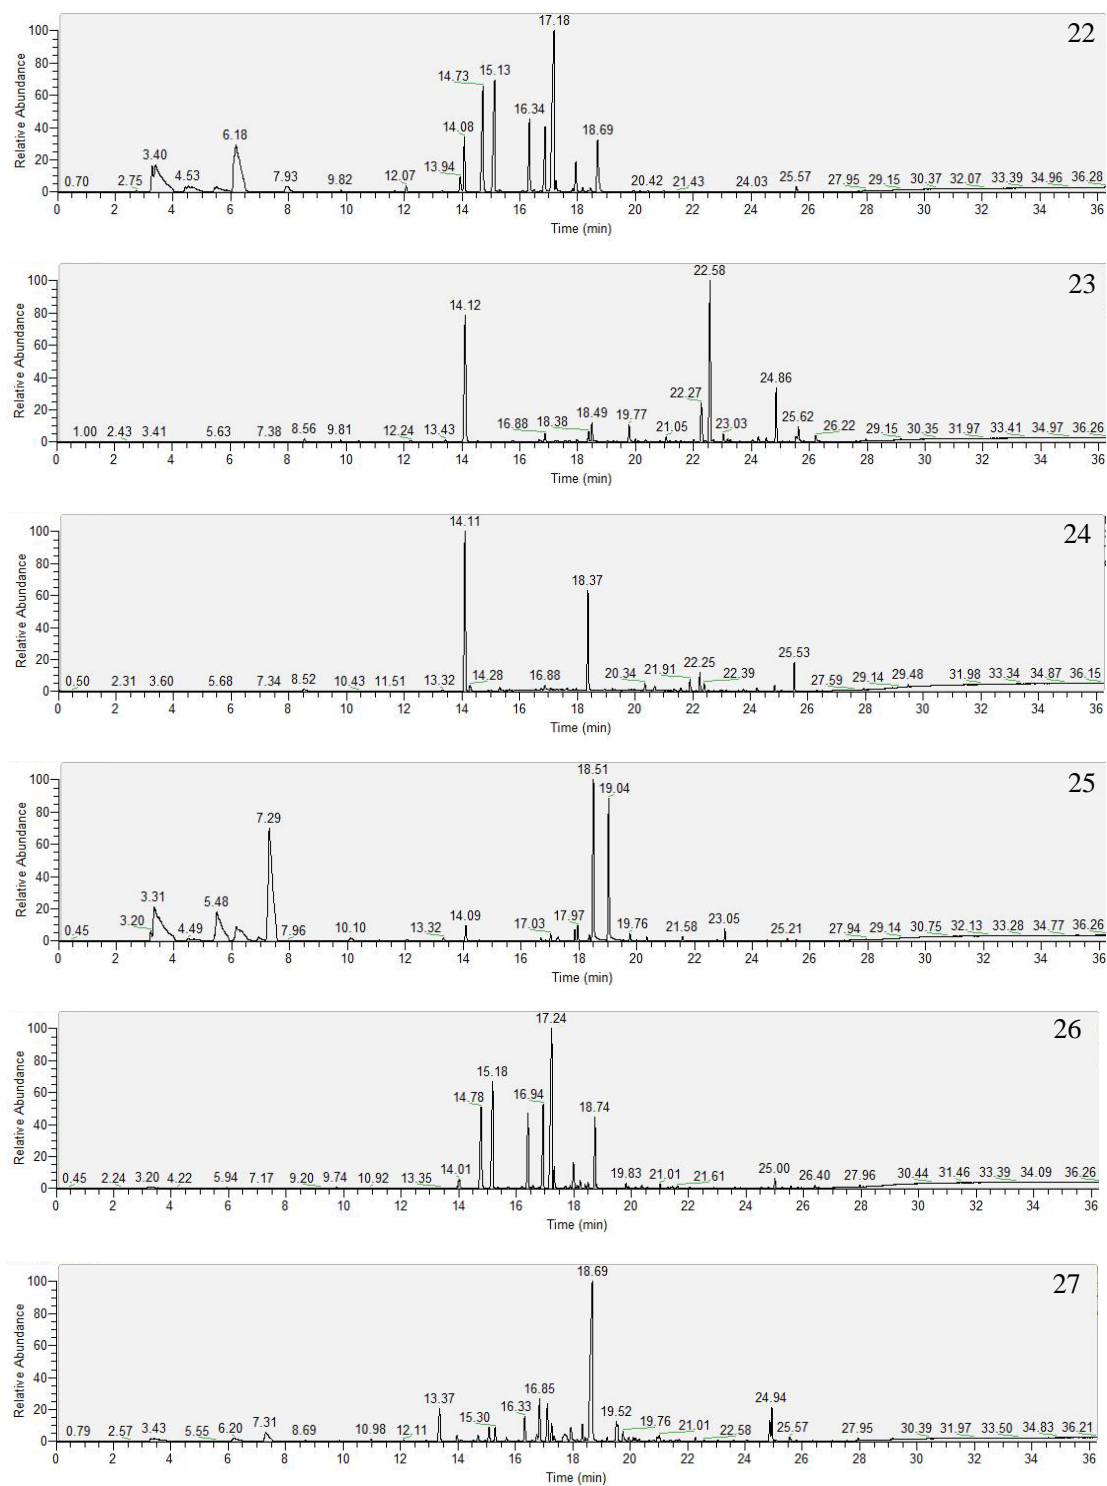

**Figure S1.** Total ionic chromatogram of scent components emitted from the flowers of twenty-seven accessions of three bearded iris species
