# Supplementary material for: Identification of Floral Scent Profiles in Bearded Irises
Source: MDPI journal article supplement (doi:10.3390/molecules24091773), 2019-05-07
Supplement: s1 [file s1]

**Table S1.** Loading matrix and Eigenvector values of the first 5 PCs.

| Variable               | Principle component |               |              |              |              |
|------------------------|---------------------|---------------|--------------|--------------|--------------|
|                        | PC1 (28.197%)       | PC2 (16.975%) | PC3 (10.378) | PC4 (8.528%) | PC5 (7.463%) |
| Methyl cinnamate       | 1.653               | 5.130         | 3.322        | -4.379       | -2.454       |
| Isosafrole             | 0.808               | 2.775         | 1.877        | -2.467       | -1.526       |
| Safrole                | 0.127               | 0.490         | 0.334        | -0.513       | -0.337       |
| Farnesol               | 0.113               | 0.409         | 0.316        | -0.418       | -0.296       |
| $\alpha$ -Longipinene  | -1.024              | 0.444         | 0.236        | 0.276        | -0.322       |
| Linalyl formate        | 0.083               | 0.232         | 0.179        | -0.259       | -0.152       |
| Thujopsene             | 2.272               | -1.413        | 0.746        | -1.991       | 2.083        |
| Geranyl acetone        | 0.071               | 0.232         | 0.113        | -0.046       | -0.042       |
| $\alpha$ -Pinene       | 1.069               | 0.004         | 0.421        | -0.831       | 1.060        |
| Limonene               | 0.680               | 0.936         | 0.653        | 0.175        | 1.515        |
| Nerolidol              | 0.350               | -1.557        | 0.927        | 2.375        | -2.867       |
| Tetrahydrogeraniol     | 0.397               | 0.308         | 0.113        | 0.591        | 0.484        |
| (-) - verbenone        | 0.095               | -0.013        | 0.098        | -0.141       | -0.014       |
| Menthol                | 0.040               | 0.101         | -0.045       | -0.032       | -0.042       |
| Isolimonene            | -0.092              | -0.093        | 0.015        | -0.133       | -0.059       |
| DL-Menthol             | 0.018               | 0.051         | 0.039        | -0.052       | -0.042       |
| Isomenthol             | 0.014               | 0.046         | 0.028        | -0.068       | -0.017       |
| Hexadecane             | -0.057              | 0.080         | 0.052        | -0.018       | 0.037        |
| Safranal               | 0.055               | -0.035        | 0.047        | -0.090       | -0.016       |
| $\alpha$ -phellandrene | 0.026               | 0.026         | 0.060        | 0.008        | -0.004       |
| Butyl butyrate         | 0.013               | 0.044         | 0.024        | -0.030       | -0.021       |
| Citronellyl acetate    | -0.112              | 0.563         | -0.056       | 0.303        | 0.157        |
| 3-methylheptane        | 0.012               | 0.047         | 0.027        | -0.029       | -0.018       |
| Farnesyl acetate       | 0.014               | 0.034         | 0.020        | -0.023       | -0.012       |
| Pentadecane            | 0.141               | 0.305         | 0.360        | 0.015        | -0.105       |
| Butyl isobutyrate      | -0.002              | 0.022         | 0.016        | -0.029       | -0.013       |
| Eugenol                | -0.312              | -0.050        | -0.010       | -0.173       | 0.122        |
| Tridecane              | -0.046              | -0.093        | 0.049        | -0.102       | 0.032        |
| Cineole                | 0.042               | 0.001         | 0.027        | -0.049       | 0.019        |
| 1-Octanol              | 0.090               | -0.019        | 0.026        | 0.011        | 0.058        |
| Tetradecane            | -0.015              | 0.041         | 0.011        | 0.009        | 0.029        |
| 1-Undecanol            | 0.028               | 0.028         | 0.025        | -0.031       | 0.022        |
| Methyl oleate          | 0.060               | 0.143         | 0.068        | -0.007       | 0.068        |
| Camphene               | 0.118               | -0.056        | -0.016       | -0.094       | 0.115        |
| trans-dihydrocarveol   | 0.161               | 0.018         | -0.331       | -0.234       | -0.342       |
| $\beta$ -pinene        | 0.235               | 0.290         | -0.030       | 0.218        | 0.348        |
| Undecane               | 0.070               | 0.099         | 0.003        | 0.107        | 0.086        |
| $\beta$ -terpineol     | -0.062              | -0.093        | 0.005        | -0.123       | 0.023        |
| Cedrol                 | -0.049              | 0.029         | 0.014        | -0.006       | 0.009        |
| Myrcene                | 0.260               | 0.235         | -0.219       | 0.174        | 0.423        |
| Sabinene               | 0.027               | 0.043         | 0.011        | 0.048        | 0.113        |

|                             |         |        |        |        |        |
|-----------------------------|---------|--------|--------|--------|--------|
| Methyl octanoate            | 0.019   | 0.068  | 0.012  | 0.077  | 0.014  |
| Lauryl alcohol              | 0.023   | 0.039  | 0.025  | 0.053  | -0.107 |
| Isoeugenol                  | -0.010  | 0.007  | 0.006  | -0.016 | -0.002 |
| Geranial                    | 0.073   | 0.070  | -0.295 | -0.068 | -0.058 |
| Terpinyl acetate            | 0.161   | -0.088 | 0.057  | 0.160  | 0.008  |
| 7,8-epoxy- $\alpha$ -ionone | 0.007   | 0.000  | 0.008  | -0.014 | -0.004 |
| Nonane                      | -0.006  | 0.013  | 0.006  | -0.004 | 0.015  |
| Citronellyl propanoate      | 0.031   | -0.014 | -0.128 | -0.074 | -0.086 |
| 3-Carene                    | 0.302   | 0.335  | -1.228 | -0.197 | -0.209 |
| l-Caryophyllene             | -14.762 | -1.656 | -0.308 | -2.087 | 1.237  |
| Butyl hydroxy anisole       | 0.004   | 0.012  | 0.005  | -0.004 | -0.003 |
| Methyl myristate            | 1.805   | 1.073  | 0.815  | 2.182  | 3.308  |
| Anisic aldehyde             | 0.156   | 0.030  | 0.058  | 0.141  | 0.387  |
| Isoprene                    | 0.056   | 0.087  | 0.022  | 0.122  | 0.226  |
| Linalool                    | 3.520   | -9.907 | 1.034  | -1.863 | -1.042 |
| 4-Carene                    | 0.101   | 0.154  | 0.066  | 0.217  | 0.396  |
| Linalyl acetate             | 1.308   | -3.443 | 0.187  | -1.602 | 0.645  |
| Geranyl phenylacetate       | 0.073   | 0.008  | 0.024  | 0.057  | 0.161  |
| Ethyl chrysanthemumate      | 0.112   | -0.113 | 0.041  | -0.025 | 0.155  |
| Alloaromadendrene           | -0.037  | -0.061 | 0.492  | 0.149  | 0.250  |
| Methyl laurate              | 0.076   | 0.511  | 0.088  | 0.918  | 0.447  |
| Sativene                    | 0.078   | 0.200  | 0.046  | 0.387  | 0.307  |
| Methyl hexadecanoate        | 0.969   | 1.183  | 0.515  | 2.704  | 2.182  |
| Methyl undecanoate          | 0.043   | 0.095  | 0.032  | 0.074  | 0.131  |
| $\beta$ -cyclocitral        | 0.028   | 0.036  | -0.079 | 0.007  | 0.021  |
| $\alpha$ -guaiene           | -0.088  | 0.035  | 0.029  | 0.083  | 0.000  |
| Ethylbenzene                | 0.043   | 0.041  | -0.037 | 0.054  | 0.117  |
| $\alpha$ -Terpinene         | -0.004  | 0.033  | -0.003 | 0.024  | 0.045  |
| trans-carveol               | 0.007   | 0.009  | 0.002  | 0.012  | 0.022  |
| $\alpha$ -Bulnesene         | -0.190  | 0.038  | 0.081  | 0.310  | -0.215 |
| (-)-4-Terpineol             | 0.007   | 0.039  | 0.016  | -0.006 | 0.082  |
| Calarene                    | -0.109  | -0.088 | 0.066  | 0.189  | -0.119 |
| 1-Decanol                   | 0.057   | -0.084 | 0.023  | -0.047 | 0.040  |
| Valencen                    | 0.115   | -0.107 | 0.082  | 0.093  | -0.079 |
| 1-methoxy-4-propyl-Benzene  | 0.003   | 0.004  | 0.001  | 0.006  | 0.011  |
| Isocyclocitral              | -0.004  | 0.001  | 0.000  | 0.001  | 0.009  |
| Methyl 10-undecenoate       | 0.035   | 0.058  | 0.031  | 0.065  | 0.054  |
| Geraniol                    | 0.896   | 0.054  | -1.366 | -0.405 | 0.652  |
| 2-pentadecanone             | 0.157   | -0.041 | -0.084 | -0.130 | 0.189  |
| $\alpha$ -Caryophyllene     | 0.073   | 0.449  | 0.246  | -0.508 | 0.670  |
| Nerol                       | 0.671   | 0.717  | -4.424 | -0.784 | -0.780 |
| Geranyl butyrate            | 0.056   | 0.048  | -0.026 | 0.068  | 0.145  |
| Neryl acetate               | 0.151   | 0.108  | -0.320 | 0.103  | 0.073  |
| 2-Dodecanone                | 0.020   | -0.005 | -0.011 | -0.017 | 0.024  |

|                                 |        |        |        |        |        |
|---------------------------------|--------|--------|--------|--------|--------|
| Methyl caprate                  | -0.002 | 0.631  | 0.011  | 1.191  | 0.264  |
| Isopulegol                      | 0.045  | -0.061 | 0.020  | -0.091 | 0.027  |
| Phenylacetaldehyde              | 0.018  | -0.010 | -0.005 | -0.004 | 0.006  |
| Methyl toluene                  | 0.006  | -0.017 | -0.005 | -0.012 | 0.010  |
| $\alpha$ -Terpineol             | 0.094  | -0.078 | 0.044  | 0.012  | 0.029  |
| Citronellyl formate             | -0.004 | 0.004  | -0.023 | -0.009 | 0.016  |
| Tridecanal                      | -0.002 | 0.007  | -0.005 | 0.011  | 0.017  |
| $\alpha$ -Santalol              | -0.083 | 0.013  | 0.001  | 0.019  | -0.008 |
| Citronellol                     | 1.554  | 1.039  | -7.271 | -1.014 | -1.574 |
| Diethyl carbonate               | 0.007  | -0.002 | -0.004 | -0.006 | 0.008  |
| cis-Citral                      | 0.028  | 0.026  | -0.123 | -0.024 | -0.021 |
| Tricyclene                      | 0.164  | -0.025 | 0.003  | 0.066  | 0.250  |
| Linalool propionate             | 0.203  | -0.163 | 0.008  | 0.059  | 0.113  |
| Undecanal                       | 0.008  | 0.019  | 0.007  | -0.010 | 0.011  |
| Cumin alcohol                   | 0.004  | -0.001 | -0.002 | -0.003 | 0.004  |
| Tridecanol                      | 0.053  | 0.124  | 0.120  | -0.074 | -0.169 |
| Aromadendrene                   | -0.020 | 0.015  | 0.052  | 0.066  | -0.053 |
| Methyl benzoate                 | -0.004 | -0.010 | 0.003  | 0.000  | 0.026  |
| Tetradecanal                    | 0.085  | 0.144  | 0.084  | 0.152  | 0.096  |
| $\alpha$ -Bisabolene            | -1.193 | -0.165 | -0.029 | -0.178 | 0.119  |
| $\alpha$ -Copaene               | -0.455 | 0.059  | -0.004 | 0.203  | 0.714  |
| Ketone                          | -0.198 | -0.036 | -0.017 | -0.086 | 0.080  |
| $\beta$ -Cedrene                | -3.313 | -0.640 | 1.316  | 3.889  | -4.374 |
| $\alpha$ -cubebene              | -0.042 | 0.035  | 0.017  | 0.020  | 0.137  |
| $\alpha$ -Cedrene               | -0.393 | -0.255 | 0.171  | 0.295  | -0.437 |
| $\alpha$ -Bisabolol             | -0.136 | -0.067 | 0.010  | -0.027 | -0.018 |
| $\delta$ -Cadinene              | -1.243 | 0.020  | -0.112 | -0.299 | 0.278  |
| Patchouli alcohol               | -0.062 | -0.010 | -0.005 | -0.026 | 0.022  |
| propyl-Benzene                  | -0.044 | -0.025 | 0.007  | 0.003  | -0.012 |
| $\alpha$ -Asarone               | -0.035 | -0.007 | -0.003 | -0.016 | 0.014  |
| Heptadecane                     | 0.050  | 0.193  | 0.131  | 0.002  | -0.120 |
| Eugenol acetate                 | -0.024 | -0.010 | -0.001 | -0.014 | 0.018  |
| Piperonal                       | -0.033 | 0.004  | 0.001  | 0.010  | 0.009  |
| Viridiflorene                   | 0.259  | -0.439 | 0.172  | 0.631  | -0.599 |
| 2-Ethylhexanol                  | -0.023 | -0.005 | -0.002 | -0.010 | 0.009  |
| $\beta$ -Asarone                | -0.015 | -0.003 | -0.001 | -0.007 | 0.006  |
| Globulol                        | 0.111  | -0.266 | 0.161  | 0.459  | -0.546 |
| $\alpha$ -Longifolene           | -0.573 | -0.045 | 0.105  | 0.194  | -0.252 |
| Caryophyllene oxide             | -0.013 | -0.010 | 0.011  | -0.016 | 0.025  |
| $\beta$ -Santalol               | -0.093 | -0.004 | 0.008  | 0.020  | -0.024 |
| $\gamma$ -Gurjunene             | 0.059  | -0.113 | 0.107  | 0.255  | -0.332 |
| 1-Isopropyl-3-tert-butylbenzene | -0.007 | 0.007  | 0.000  | 0.011  | 0.025  |
| (-)-Aristolene                  | -0.033 | -0.042 | 0.001  | -0.031 | 0.008  |
| 2-tert-Butyl-4-hydroxyanisole   | -0.008 | -0.002 | -0.001 | -0.004 | 0.003  |

|                           |        |        |        |        |        |
|---------------------------|--------|--------|--------|--------|--------|
| 2-Isopropyl-5-ketohexanal | -0.008 | -0.002 | -0.001 | -0.004 | 0.003  |
| $\beta$ -Eudesmene        | -0.176 | 0.020  | 0.023  | 0.120  | -0.117 |
| <i>o</i> -Diethylbenzene  | -0.043 | -0.022 | 0.025  | 0.083  | -0.096 |
| Benzyl formate            | -0.021 | 0.005  | 0.003  | 0.017  | -0.016 |
| Phenylethyl alcohol       | 0.026  | 0.040  | 0.073  | -0.078 | 0.010  |
| $\gamma$ -Terpinene       | -0.037 | -0.038 | 0.030  | 0.090  | -0.087 |
| Phenylacetic acid         | -0.013 | 0.003  | 0.002  | 0.010  | -0.010 |
| Dolcymene                 | -0.050 | -0.126 | 0.076  | 0.204  | -0.273 |
| Terpinolene               | -0.048 | 0.029  | 0.001  | 0.057  | 0.094  |
| 2-fenyl-1-Propanal        | -0.030 | 0.007  | -0.001 | 0.013  | 0.000  |
| Isolongifolene            | 0.000  | -0.008 | 0.003  | 0.002  | 0.000  |
| $\alpha$ -Thujon          | 0.059  | 0.356  | 0.140  | 0.117  | -0.186 |
| 2,2,4-trimethylpentane    | 0.033  | 0.060  | 0.031  | 0.004  | -0.058 |
| Myristyl alcohol          | 0.007  | -0.100 | 0.054  | 0.035  | -0.189 |
| Cryptone                  | -0.035 | -0.013 | 0.024  | -0.051 | -0.020 |
| 2,5-Dimethylhexane        | 0.123  | 0.183  | -0.006 | 0.225  | 0.160  |
| Dihydro-carvone           | 0.002  | 0.003  | 0.002  | 0.004  | -0.004 |
| Methyl linoleate          | 0.026  | 0.060  | 0.025  | -0.005 | .039   |
| Methyl stearate           | .019   | .050   | .018   | .023   | 0.046  |
| Allyl hexanoate           | 0.006  | 0.021  | 0.000  | 0.030  | 0.008  |
| 2,4-Dimethylpentane       | 0.000  | 0.001  | 0.003  | 0.005  | -0.007 |
| Cyclohexaneethanol        | 0.173  | 0.002  | -0.669 | -0.083 | -0.178 |
| Methyl nonanoate          | 0.051  | 0.073  | -0.246 | 0.070  | -0.030 |
| Geranic acid              | 0.037  | 0.021  | -0.177 | -0.027 | -0.037 |
| Menthol acetic ester      | 0.036  | 0.007  | -0.133 | -0.008 | -0.037 |
| Citronellyl butyrate      | 0.020  | 0.010  | -0.089 | -0.009 | -0.008 |
| Crotonaldehyde            | 0.012  | 0.004  | -0.057 | -0.008 | -0.011 |
| Carvomenthene             | 0.004  | 0.004  | -0.024 | -0.002 | -0.003 |
| Methyl salicylate         | 0.005  | 0.002  | -0.022 | -0.003 | -0.004 |
| Benzyl benzoate           | 0.006  | 0.006  | -0.012 | -0.006 | 0.001  |
| Benzoic aldehyde          | 0.003  | 0.001  | -0.012 | -0.002 | -0.002 |
| m-Isopropyl ethyl benzene | 0.019  | -0.044 | 0.021  | 0.054  | -0.080 |
| Cinnamaldehyde            | 0.038  | 0.119  | 0.278  | -0.239 | -0.427 |
| m-Tolualdehyde            | -0.059 | 0.091  | -0.005 | 0.109  | 0.047  |
| Amyl caprylate            | 0.002  | -0.005 | 0.006  | 0.006  | -0.017 |
| Longicyclene              | 0.022  | -0.048 | 0.017  | 0.003  | 0.030  |
| Phenetole                 | 0.002  | -0.004 | 0.002  | 0.006  | -0.009 |
| Fenchol                   | 0.492  | -0.765 | 0.097  | -0.208 | 0.374  |
| Pantolactone              | 0.153  | -0.204 | 0.059  | 0.009  | 0.065  |
| Methyl capronate          | 0.005  | -0.008 | 0.002  | -0.002 | 0.004  |
| Eicosane                  | -0.021 | 0.011  | -0.001 | 0.014  | 0.026  |
| M-Diethylbenzene          | 0.031  | 0.017  | 0.035  | -0.029 | -0.007 |
| 1-nonanol                 | 0.005  | 0.013  | 0.001  | 0.013  | 0.002  |
| O-Xylene                  | 0.000  | 0.001  | 0.003  | -0.003 | -0.006 |

|                                 |        |        |        |        |        |
|---------------------------------|--------|--------|--------|--------|--------|
| Thymol                          | 0.000  | 0.001  | 0.003  | -0.003 | -0.006 |
| Butyl caprylate                 | -0.001 | -0.001 | 0.004  | 0.003  | -0.011 |
| Geranyl tiglate                 | -0.004 | -0.079 | 0.044  | 0.123  | -0.161 |
| $\gamma$ -Nonanolactone         | -0.039 | -0.033 | 0.019  | 0.052  | -0.012 |
| $\gamma$ -Decalactone           | -0.007 | -0.007 | 0.012  | 0.052  | -0.042 |
| 2,3,4-trimethylpentane          | 0.025  | -0.018 | 0.010  | 0.060  | -0.026 |
| Tetrahydrofurfuryl acetate      | -0.016 | -0.080 | 0.012  | -0.038 | 0.002  |
| Nootkanone                      | 0.002  | -0.005 | 0.003  | 0.006  | -0.002 |
| $\alpha$ -Cyclociral            | 0.002  | -0.008 | 0.003  | 0.002  | -0.005 |
| Hydroquinone Dimethyl           | 0.122  | 0.573  | 0.263  | 0.386  | 0.129  |
| Mesitylene                      | -0.009 | -0.012 | 0.007  | 0.011  | -0.014 |
| Linalyl isovalerate             | -0.008 | -0.009 | 0.005  | 0.009  | -0.012 |
| Methyl acetate                  | -0.004 | -0.005 | 0.003  | 0.005  | -0.007 |
| Methyl m-tolyl ketone           | 0.009  | -0.029 | 0.009  | 0.014  | -0.028 |
| 2,2,5-Trimethyl hexane          | 0.004  | 0.008  | 0.007  | -0.013 | 0.012  |
| Dodecane                        | 0.017  | 0.005  | 0.003  | 0.008  | 0.018  |
| Octyl formate                   | 0.032  | -0.033 | 0.010  | 0.001  | 0.027  |
| Cyclohexane                     | 0.009  | 0.030  | -0.003 | 0.045  | 0.017  |
| 2,6-Di-tert-butyl-p-cresol      | 0.012  | 0.021  | -0.002 | 0.031  | 0.027  |
| $\gamma$ -Valerolactone         | 0.005  | 0.012  | -0.002 | 0.016  | 0.008  |
| 6-Decalactone                   | 0.006  | -0.004 | 0.001  | 0.002  | 0.006  |
| Dihydro- $\alpha$ -ionone       | 0.002  | 0.004  | -0.001 | 0.005  | 0.003  |
| trans-2-Nonenal                 | 0.002  | 0.004  | 0.000  | 0.007  | 0.008  |
| trans-2-Pinanol                 | 0.003  | 0.021  | 0.000  | 0.030  | 0.036  |
| 2,2,4,4-Tetramethyl-3-pentanone | 0.014  | -0.014 | 0.005  | 0.001  | 0.022  |
| 2-methyl-propanoic acetyl ester | -0.015 | 0.048  | 0.009  | 0.132  | 0.004  |
| 2,3-Dimethylcyclohexanol        | -0.002 | 0.012  | 0.001  | 0.025  | 0.002  |
| Decanal                         | -0.010 | 0.005  | 0.000  | 0.013  | 0.003  |
| $\beta$ -Pinone                 | -0.001 | 0.005  | 0.001  | 0.010  | 0.001  |
| 3-Methylpentane                 | 0.040  | -0.080 | 0.016  | -0.038 | 0.021  |
| $\beta$ -Thujone                | 0.040  | -0.072 | 0.017  | 0.027  | -0.067 |
| Isohexane                       | 0.018  | -0.031 | 0.007  | 0.012  | -0.029 |
| Neohexane                       | 0.013  | -0.023 | 0.005  | 0.008  | -0.021 |
| P-methyl benzaldehyde           | -0.054 | -0.005 | -0.004 | -0.011 | 0.006  |
| Pentanol                        | 0.003  | -0.005 | 0.001  | 0.002  | -0.005 |
| Citronellene                    | -0.060 | -0.073 | 0.000  | -0.063 | 0.023  |
| pentadecanol                    | -0.004 | -0.005 | 0.000  | -0.004 | 0.002  |
| 2-ethyl-1-butanol               | -0.004 | -0.005 | 0.000  | -0.004 | 0.002  |
| Cedryl acetate                  | 0.005  | -0.005 | 0.002  | -0.001 | 0.007  |
| Myristic acid                   | 0.003  | -0.002 | 0.001  | 0.000  | 0.003  |
| Isoamyl butyrate                | 0.005  | -0.010 | 0.002  | -0.006 | 0.003  |
| Perillyl aldehyde               | 0.003  | 0.004  | -0.014 | -0.002 | -0.003 |
| isogeraniol                     | 0.002  | 0.003  | -0.012 | -0.002 | -0.003 |
| Methyl anthranilate             | -0.093 | 0.197  | -0.029 | 0.152  | 0.139  |

|                                 |        |       |        |       |       |
|---------------------------------|--------|-------|--------|-------|-------|
| Piperitone                      | -0.036 | 0.077 | -0.011 | 0.059 | 0.054 |
| 3,5-Dimethyl-2-cyclohexen-1-one | -0.032 | 0.067 | -0.010 | 0.052 | 0.047 |

---
